# Supplementary material
Source: MDPI journal article supplement (https://www.mdpi.com/2073-4441/14/9/1349)
Supplement: s1 [file s1]

Supplementary Table S1. List of Ephemeroptera species in the Raba River in 1966-1967 [15], Dunajec River in 1992-1993 (sites 1-3) and 1999 (sites 4-5) [18, 26] and Vistula River in 1982-1983 [27] (+ < 1%; ++ 1–10%; +++ > 10%; X - extinct species, present in the 1940's [31]).

| Species                                          | Rivers<br>Raba |     |     |     |     |     |     |     |     |     | Dunajec |     |     |     |    | Vistula |
|--------------------------------------------------|----------------|-----|-----|-----|-----|-----|-----|-----|-----|-----|---------|-----|-----|-----|----|---------|
|                                                  | 1              | 2   | 3   | 4   | 5   | 6   | 7   | 8   | 9   | 10  | 1       | 2   | 3   | 4   | 5  |         |
| <i>Baetis rhodani</i> (Pictet, 1843)             |                | ++  | ++  | +++ | +++ | +++ | ++  | ++  | +   | +   | ++      | ++  | ++  |     | +  |         |
| <i>Ecdyonurus subalpinus</i> Klapalek, 1907      | +++            | +   |     |     |     |     |     |     |     |     |         |     |     |     |    |         |
| <i>Baetis alpinus</i> (Pictet, 1843)             | +++            | +++ | +++ | +++ | ++  | +   |     |     |     |     |         |     |     |     |    |         |
| <i>Rhithrogena iridina</i> (Kolenati, 1839)      | +++            | +++ | +++ | ++  |     |     |     |     |     |     |         |     |     |     |    |         |
| <i>Rhithrogena loyolaea</i> Navàs, 1922          | ++             | +++ | +   | +   |     |     |     |     |     |     |         |     |     |     |    |         |
| <i>Ameletus inopinatus</i> Eaton, 1887           |                | +++ | +++ | +   | +   |     |     |     |     |     |         |     |     |     |    |         |
| <i>Baetis melanonyx</i> (Pictet, 1843)           |                | ++  | ++  | ++  | +   | +   |     |     |     |     | +       |     | +   | +   |    |         |
| <i>Baetis muticus</i> (Linnaeus, 1758)           |                | +   | ++  | ++  | ++  | ++  | ++  | ++  | +   | +   |         | +   |     | +   | +  |         |
| <i>Ecdyonurus venosus</i> (Fabricius, 1775)      |                | +   | ++  | +   | +   | +   |     |     |     |     |         | +   | +   | +   | +  | X       |
| <i>Electrogena lateralis</i> (Curtis, 1834)      |                | +   | ++  | +   | ++  | ++  | +   | +   | ++  | +   | +       | +   | ++  |     |    |         |
| <i>Habroleptoides modesta</i> (Hagen, 1864)      |                | +   | +   | ++  | ++  | ++  | ++  | ++  | +   |     |         |     |     |     |    |         |
| <i>Rhithrogena hybrida</i> Eaton, 1885           |                | +   | ++  |     |     |     |     |     |     |     |         |     |     |     |    |         |
| <i>Baetis scambus</i> Eaton, 1870                |                | +   | +   | +   | ++  | ++  | +   |     |     |     |         |     |     |     |    |         |
| <i>Ephemerella mucronata</i> (Bengtsson, 1909)   |                |     | +   | +   | +   | +   | +   |     |     |     |         |     | +   |     |    |         |
| <i>Rhithrogena carpatoalpina</i> *               |                |     | +   | +++ | ++  | +   | +   |     |     |     |         | +   |     |     |    |         |
| <i>Baetis beskidensis</i> Sowa, 1972             |                |     | +   | +   | +   | +   | +   | +   | +   | +   | +       | ++  | ++  |     |    |         |
| <i>Baetis lutheri</i> Muller-Liebenau, 1967      |                |     |     | ++  | +++ | ++  | +++ | ++  | +   | +   | +++     | +++ | +++ | +++ | ++ |         |
| <i>Torleya major</i> (Klapalek, 1905)            |                |     |     | ++  | +   | +   | +   | +   | +   | +   |         |     |     |     |    |         |
| <i>Epeorus sylvicola</i> (Pictet, 1865)          |                |     |     | ++  | +   | +   | +   | +   |     |     |         |     |     |     |    |         |
| <i>Serratella ignita</i> (Poda, 1761)            |                |     |     | ++  | ++  | ++  | ++  | ++  | ++  | +++ | ++      | +++ | +++ | ++  | ++ | X       |
| <i>Caenis beskidensis</i> Sowa, 1973             |                |     |     | +   | ++  |     |     |     |     |     |         |     |     |     |    |         |
| <i>Caenis rivulorum</i> Eaton, 1884              |                |     |     | +   | ++  | ++  | +   | +   |     |     |         |     |     |     |    |         |
| <i>Rhithrogena semicolorata</i> (Curtis, 1834)   |                |     |     | +   | +   | ++  | ++  | ++  | ++  | ++  |         |     | +   |     |    |         |
| <i>Ecdyonurus submontanus</i> Landa, 1969        |                |     |     | +   | +   |     |     |     |     |     |         |     |     |     | +  |         |
| <i>Ecdyonurus starmachi</i> Sowa, 1971           |                |     |     | +   | +   |     |     |     |     |     |         |     |     | +   |    |         |
| <i>Ecdyonurus torrentis</i> Kimmins, 1942        |                |     |     | +   | +   | +   | ++  | ++  | ++  |     |         | +   | +   |     |    |         |
| <i>Ecdyonurus carpathicus</i> Sowa, 1973         |                |     |     | +   |     |     |     |     |     |     |         |     |     |     | +  |         |
| <i>Habrophlebia lauta</i> Eaton, 1884            |                |     |     | +   | +   | +   | +   | +   | +   | +   |         | +   |     |     |    |         |
| <i>Ephemerella danica</i> Muller, 1764           |                |     |     | +   | +   | +   |     |     |     |     |         |     |     |     |    |         |
| <i>Baetis fuscatus</i> (Linnaeus, 1761)          |                |     |     |     | ++  | +++ | +++ | +++ | +++ | +++ | +++     | +++ | +++ | +   | +  | X       |
| <i>Baetis vardarensis</i> Ikononov, 1962         |                |     |     |     | ++  | +++ | +++ | +++ | +++ | +++ | ++      | ++  | ++  |     |    |         |
| <i>Ecdyonurus dispar</i> (Curtis, 1834)          |                |     |     |     | +   | ++  | ++  | ++  | ++  | ++  |         |     |     | +   | +  | X       |
| <i>Caenis pseudorivulorum</i> Keffermuller, 1960 |                |     |     |     | +   | +   | +   | +++ | +++ | +++ |         |     |     |     |    |         |

| Species                                               | 1 | 2 | 3 | 4 | 5 | 6  | 7   | 8  | 9   | 10 | 1  | 2  | 3  | 4 | 5 |   |
|-------------------------------------------------------|---|---|---|---|---|----|-----|----|-----|----|----|----|----|---|---|---|
| <i>Rhithrogena germanica</i> Eaton, 1885              |   |   |   |   | + | +  | ++  | +  | +   |    |    |    |    |   |   |   |
| <i>Oligoneuriella rhenana</i> (Imhoff, 1852)          |   |   |   |   | + | ++ | +++ | ++ | +++ | +  | +  | +  | ++ |   |   |   |
| <i>Centroptilum luteolum</i> (Muller, 1776)           |   |   |   |   | + | +  | +   | +  | ++  | +  |    |    |    |   |   |   |
| <i>Caenis macrura</i> Stephens, 1835                  |   |   |   |   | + | +  | +   | ++ | +   | ++ |    |    |    |   |   | X |
| <i>Rhithrogena diaphana</i> Navàs, 1917               |   |   |   |   |   | +  | +   | +  | ++  | ++ |    |    |    |   |   |   |
| <i>Ecdyonurus insignis</i> (Eaton, 1870)              |   |   |   |   |   | +  | +   | +  | ++  | +  |    |    |    |   |   | X |
| <i>Baetis vernus</i> Curtis, 1834                     |   |   |   |   |   | +  |     |    |     |    | ++ |    |    |   |   |   |
| <i>Potamanthus luteus</i> (Linnaeus, 1767)            |   |   |   |   |   | +  | +   | ++ | ++  | ++ |    |    |    |   |   |   |
| <i>Ephemera lineata</i> Eaton, 1870                   |   |   |   |   |   | +  | +   | +  | +   | +  |    |    |    |   |   |   |
| <i>Acentrella sinaicus</i> (Bogoescu, 1931)           |   |   |   |   |   | +  | +   |    |     |    |    |    |    |   |   |   |
| <i>Procloeon pennulatum</i> (Eaton, 1870)             |   |   |   |   |   | +  | +   | +  | +   | +  |    |    |    |   |   |   |
| <i>Procloeon pulchrum</i> (Eaton, 1885)               |   |   |   |   |   |    |     | +  | +   | ++ |    |    |    |   |   |   |
| <i>Ecdyonurus macani</i> Thomas & Sowa, 1970          |   |   |   |   |   |    | +   | +  | +   |    |    |    |    |   |   |   |
| <i>Heptagenia sulphurea</i> (Muller, 1776)            |   |   |   |   |   |    | +   | +  | +   | +  |    | ++ |    | + | + | X |
| <i>Paraleptophlebia submarginata</i> (Stephens, 1835) |   |   |   |   |   |    | +   | +  | +   | +  |    |    |    |   |   | X |
| <i>Ecdyonurus aurantiacus</i> (Burmeister, 1839)      |   |   |   |   |   |    | +   | +  | ++  | ++ |    |    |    |   |   |   |
| <i>Siphonurus lacustris</i> (Eaton, 1870)             |   |   |   |   |   |    | +   |    |     |    |    |    |    |   |   |   |
| <i>Heptagenia coerulans</i> Rostock, 1878             |   |   |   |   |   |    |     | +  | +   |    |    |    |    |   |   | X |
| <i>Choroterpes picteti</i> (Eaton, 1871)              |   |   |   |   |   |    |     | +  |     |    |    |    |    |   |   |   |
| <i>Ephemerella notata</i> Eaton, 1887                 |   |   |   |   |   |    |     | +  | +   |    |    |    |    |   |   |   |
| <i>Heptagenia longicauda</i> (Stephens, 1835)         |   |   |   |   |   |    |     | +  | +   | ++ |    |    |    |   |   |   |
| <i>Procloeon bifidum</i> (Bengtsson, 1912)            |   |   |   |   |   |    |     | +  | ++  | +  |    |    |    |   |   |   |
| <i>Acentrella inexpectata</i> (Tshernova, 1928)       |   |   |   |   |   |    |     | +  | +   | +  |    |    |    |   |   |   |
| <i>Baetis calcaratus</i> Keffermuller, 1972           |   |   |   |   |   |    |     |    | +   | ++ |    |    |    |   |   |   |
| <i>Baetis gracilis</i> Bogoescu & Tabacaru, 1957      |   |   |   |   |   |    |     |    | +   | ++ |    |    |    |   |   |   |
| <i>Heptagenia flava</i> Rostock, 1878                 |   |   |   |   |   |    |     |    | +   | +  |    |    |    |   |   | X |
| <i>Baetis niger</i> (Linnaeus, 1761)                  |   |   |   |   |   |    |     |    | +   |    |    |    |    |   |   |   |
| <i>Baetis buceratus</i> Eaton, 1870                   |   |   |   |   |   |    |     |    | +   | ++ |    |    |    |   |   |   |
| <i>Ecdyonurus affinis</i> (Eaton, 1883)               |   |   |   |   |   |    |     |    | +   |    |    |    |    |   |   |   |
| <i>Paraleptophlebia cincta</i> (Retzius, 1783)        |   |   |   |   |   |    |     |    |     | +  |    |    |    |   |   |   |
| <i>Isonychia ignota</i> (Walker, 1853)                |   |   |   |   |   |    |     |    |     | +  |    |    |    |   |   |   |
| <i>Electrogena quadrilineata</i> (Landa, 1969)        |   |   |   |   |   |    |     |    |     |    |    |    |    |   |   |   |
| <i>Acentrella sinaica</i> Bogoescu, 1931              |   |   |   |   |   |    |     |    |     |    | +  | +  | +  |   |   |   |
| <i>Epeorus sylvicola</i> (Pictet, 1865)               |   |   |   |   |   |    |     |    |     |    |    |    | +  |   |   |   |
| <i>Caenis beskidensis</i> Sowa, 1973                  |   |   |   |   |   |    |     |    |     |    |    | +  | +  |   |   |   |
| <i>Caenis horaria</i> (Linnaeus, 1758)                |   |   |   |   |   |    |     |    |     |    |    | +  | +  |   |   |   |
| <i>Cloeon dipterum</i> (Linnaeus, 1761)               |   |   |   |   |   |    |     |    |     |    |    |    |    |   |   | X |

\**Rhithrogena carpatoalpina* Klonowska & Olechowska & Sartori & Weichselbaumer 1987

Supplementary Table S2. List of Oligochaeta species in the Raba River in 1966-1967 (+ <100, ++ 100–1000, +++ >1000 specimens) [17] as well as in the Dunajec River in 1992-1993 (sites 1-3) and 1999 (sites 4-5) [18,26] and Vistula River in 1982-1983 [27] (+ < 1%; ++ 1–10%; +++ > 10%).

| Species                                                    | Raba River |   |   |    |    |     |    |    |   |     | Dunajec River |     |     |     |     | Vistula River |    |   |     |     |     |   |
|------------------------------------------------------------|------------|---|---|----|----|-----|----|----|---|-----|---------------|-----|-----|-----|-----|---------------|----|---|-----|-----|-----|---|
|                                                            | 1          | 2 | 3 | 4  | 5  | 6   | 7  | 8  | 9 | 10  | 1             | 2   | 3   | 4   | 5   | 1             | 2  | 3 | 4   | 5   | 6   |   |
| <i>Amphichaeta leydigi</i> Tauber, 1879                    |            |   |   |    |    |     |    | ++ |   |     | +             | ++  | ++  |     |     | present       |    |   |     |     |     |   |
| <i>Chaetogaster diaphanus</i> (Gruithuisen, 1828)          |            |   |   |    |    | +   |    | +  |   | ++  | +             | ++  | +   |     | ++  |               |    | + |     | +   | +   | + |
| <i>Chaetogaster diastrophus</i> (Gruithuisen, 1828)        |            |   |   | ++ |    | ++  |    |    | + | +   | ++            | ++  | +   |     |     |               |    |   |     |     |     |   |
| <i>Chaetogaster langi</i> Bretscher, 1896                  |            |   |   |    |    |     |    | +  |   |     |               |     |     |     |     |               |    |   |     |     |     |   |
| <i>Paranais frici</i> Hrabe, 1941                          |            |   |   |    |    |     |    | +  |   |     |               |     |     |     |     |               |    |   |     |     |     |   |
| <i>Homochaeta setosa</i> (Moszynski, 1933)                 |            |   |   |    |    |     |    |    |   | +   |               |     |     |     |     |               |    |   |     |     |     |   |
| <i>Uncinais uncinata</i> (Orsted, 1842)                    |            |   |   |    |    |     |    |    | + | +   |               |     |     |     |     |               |    |   |     |     |     |   |
| <i>Ophidonais serpentina</i> (Müller, 1774)                |            |   |   |    |    | +   |    | +  | + |     |               |     |     |     |     |               |    |   |     |     |     |   |
| <i>Pristina (Pristinella) amphibiotica</i> Lastockin, 1927 |            |   |   |    |    |     |    |    |   |     |               |     | +   |     |     |               |    |   |     |     |     |   |
| <i>Pristina (Pristinella) bilobata</i> (Bretscher, 1903)   |            |   |   |    | +  |     | +  |    |   |     |               |     |     |     |     |               |    |   |     |     |     |   |
| <i>Pristina (Pristina) aequiseta</i> Bourne, 1891          |            |   |   | +  |    | +   | +  | +  | + | +   |               |     | ++  | +   | +   |               |    |   |     |     |     |   |
| <i>Pristina jenkiniae</i> (Stephenson, 1931)               |            |   |   |    |    |     |    |    | + |     | +             | +   | ++  | +   |     |               |    |   |     |     |     |   |
| <i>Pristina (Pristina) longiseta</i> Ehrenberg, 1828       |            |   |   |    |    | +   |    |    | + |     |               |     |     |     |     |               |    |   |     |     |     |   |
| <i>Pristina (Pristinella) menoni</i> (Aiyer, 1929)         |            |   |   | +  | +  | ++  | +  | +  | + | +   | +             | +   | ++  |     |     |               |    |   |     |     |     |   |
| <i>Pristina (Pristinella) rosea</i> (Piguet, 1906)         |            |   |   |    |    |     | +  |    |   |     | +             |     | ++  |     |     |               |    |   |     |     |     |   |
| <i>Slavina appendiculata</i> (Udekem, 1855)                |            |   |   |    |    | +   |    |    |   |     |               | +   |     |     |     |               |    |   |     |     |     |   |
| <i>Vejdovskyella intermedia</i> (Bretscher, 1896)          |            |   |   |    |    |     |    | +  |   |     |               | +   | +   |     |     |               |    |   |     |     |     |   |
| <i>Stylaria lacustris</i> (Linnaeus, 1767)                 |            |   |   |    |    |     |    | +  | + |     |               |     |     |     |     |               |    |   | +   | +   | +   |   |
| <i>Piguetiella blanci</i> (Piguet, 1906)                   |            |   |   |    |    |     |    |    | + | +   |               |     |     |     |     |               |    |   |     |     |     |   |
| <i>Nais alpina</i> Sperber, 1948                           |            |   |   | ++ | ++ | ++  | +  | ++ | + | ++  | +             | +++ | ++  | ++  |     |               |    |   |     |     |     |   |
| <i>Nais barbata</i> Muller, 1774                           |            |   |   |    | +  |     | +  |    | + |     | +++           | ++  | ++  | ++  | +++ | +             | +  |   | +   | +   |     |   |
| <i>Nais behningi</i> Michaelsen, 1923                      |            |   |   |    |    | +   |    | +  |   | +   |               |     |     |     |     |               |    |   |     |     |     |   |
| <i>Nais bretscheri</i> Michaelsen, 1899                    |            | + | + | ++ | ++ | +++ | ++ | ++ | + | +++ | +++           | +++ | +++ | +++ | +   |               |    |   |     |     |     |   |
| <i>Nais christinae</i> Kasprzak, 1973                      |            |   |   |    |    |     |    |    |   |     | +             | +   | +   |     | +++ |               |    |   |     |     |     |   |
| <i>Nais communis</i> Piguet, 1906                          | +          | + | + | +  | +  | ++  | +  | ++ | + | +++ | ++            | ++  | ++  | +   | ++  |               |    |   |     |     |     |   |
| <i>Nais elinguis</i> Müller, 1774                          |            |   |   | +  | +  | +++ | +  | ++ | + | +++ | +++           | +++ | +++ |     | +++ | ++            | ++ | + | +++ | +++ | +++ |   |
| <i>Nais pardalis</i> Piguet, 1906                          |            |   | + | ++ | ++ | ++  | ++ | +  | + | +++ | ++            | ++  | ++  | ++  | +   |               |    |   |     |     |     |   |
| <i>Nais pseudobtusa</i> Piguet, 1906                       |            |   |   | +  | +  | ++  |    | +  | + | +++ |               | +   |     |     |     |               |    |   |     |     |     |   |



| Species                                           | 1 | 2 | 3 | 4 | 5 | 6 | 7 | 8 | 9 | 10 | 1 | 2 | 3 | 4 | 5 | 1       | 2 | 3 | 4 | 5 | 6 |
|---------------------------------------------------|---|---|---|---|---|---|---|---|---|----|---|---|---|---|---|---------|---|---|---|---|---|
| <i>Dero digitata</i> Müller, 1774                 |   |   |   |   |   |   |   |   |   |    |   |   |   |   |   | +       | + |   | + | + | + |
| <i>Aulophorus furcatus</i> (Oken, 1815)           |   |   |   |   |   |   |   |   |   |    |   |   |   |   |   | +       | + |   |   | + | + |
| <i>Dero digitata</i> (Muller, 1774)               |   |   |   |   |   |   |   |   |   |    |   |   |   |   |   | +       | + |   | + | + | + |
| <i>Psammoryctides albicola</i> (Michaelsen, 1901) |   |   |   |   |   |   |   |   |   |    |   |   |   |   |   |         |   |   | + | + | + |
| <i>Paranais frici</i> Hrabě, 1941                 |   |   |   |   |   |   |   |   |   |    |   |   |   |   |   |         |   |   |   | + | + |
| <i>Spirosperma ferox</i> Eisen, 1879              |   |   |   |   |   |   |   |   |   |    |   |   |   |   |   | present |   |   |   |   |   |
| <i>Quistadrilus multisetosus</i> (Smith, 1900)    |   |   |   |   |   |   |   |   |   |    |   |   |   |   |   | present |   |   |   |   |   |

\**Cernosvitoviella carpatica* Nielsen & Christensen, 1959, present – the exact site is unknown.
